# Supplementary material for: Accuracy of controlled attenuation parameter measurement for the detection of steatosis in autoimmune liver diseases
Source: PubMed Central journal article supplement — JHEP Rep. 2023 Aug 29;5(12):100898. doi: 10.1016/j.jhepr.2023.100898 (PMC10632533; doi:10.1016/j.jhepr.2023.100898), 2023-08-29
Supplement: mmc1.pdf [file mmc1.pdf]

# Accuracy of controlled attenuation parameter (CAP) measurement for the detection of steatosis in autoimmune liver diseases

Silja Steinmann, Johannes Hartl, Sören Weidemann, Katja Füssel, Claudia Kroll,  
Marcial Sebode, Ansgar Wilhelm Lohse, Christoph Schramm

## Table of contents

|                |    |
|----------------|----|
| Fig. S1 .....  | 2  |
| Fig. S2 .....  | 3  |
| Fig. S3 .....  | 4  |
| Fig. S4 .....  | 5  |
| Fig. S5 .....  | 6  |
| Fig. S6 .....  | 6  |
| Fig. S7 .....  | 7  |
| Table S1 ..... | 8  |
| Table S2 ..... | 9  |
| Table S3 ..... | 10 |
| Table S4 ..... | 11 |

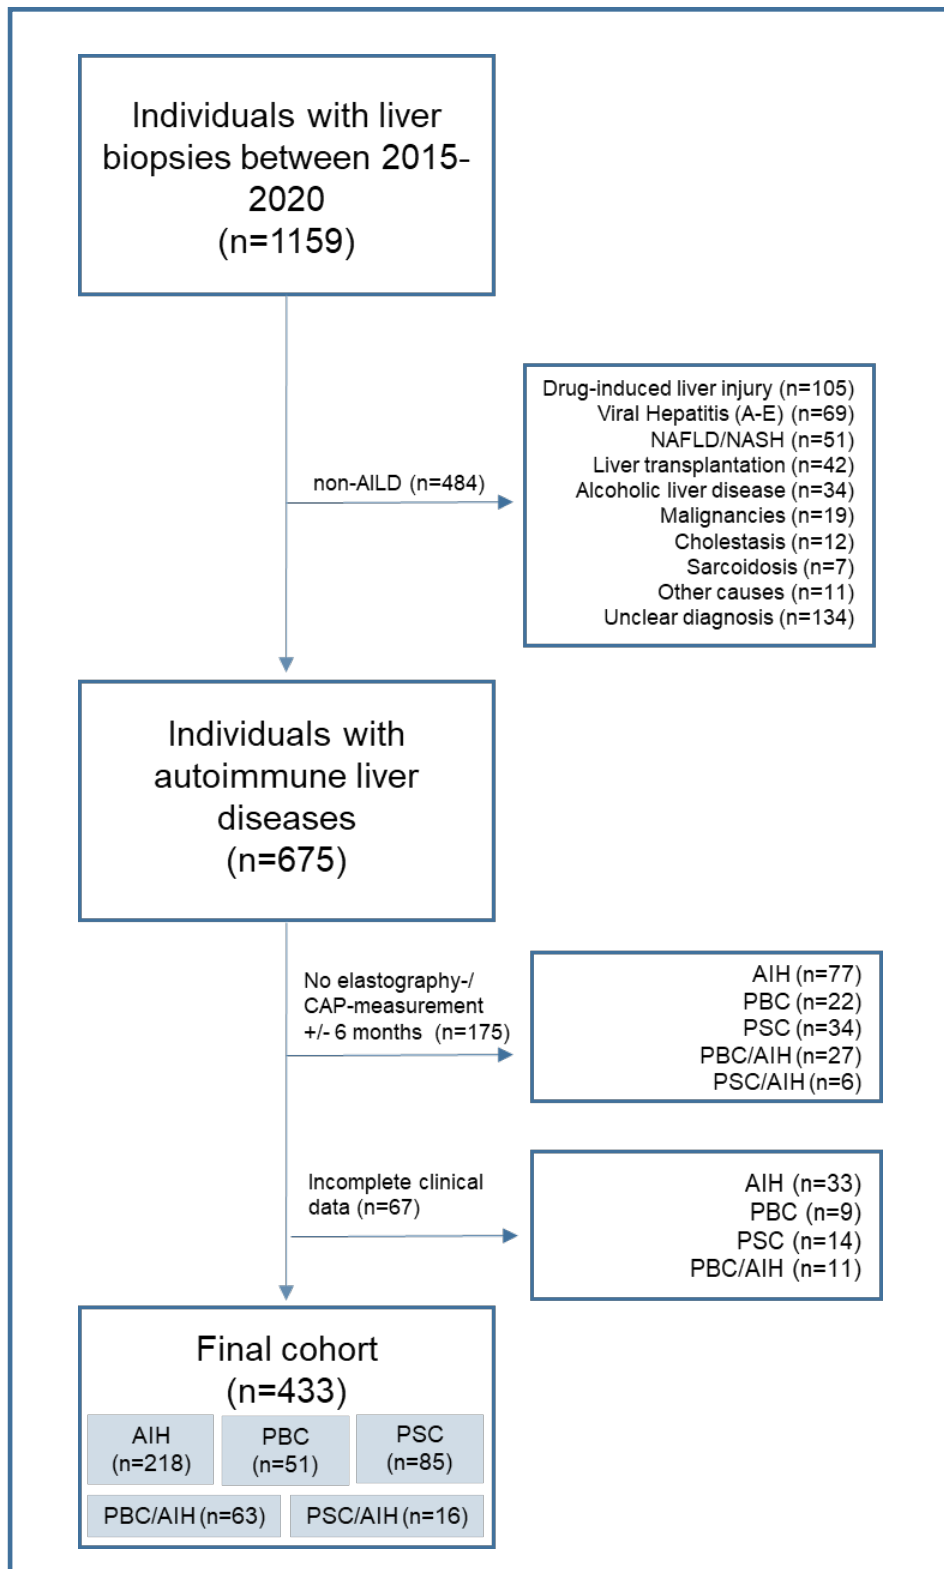

**Fig. S1: Flowchart of participant selection for the evaluation of CAP accuracy.**

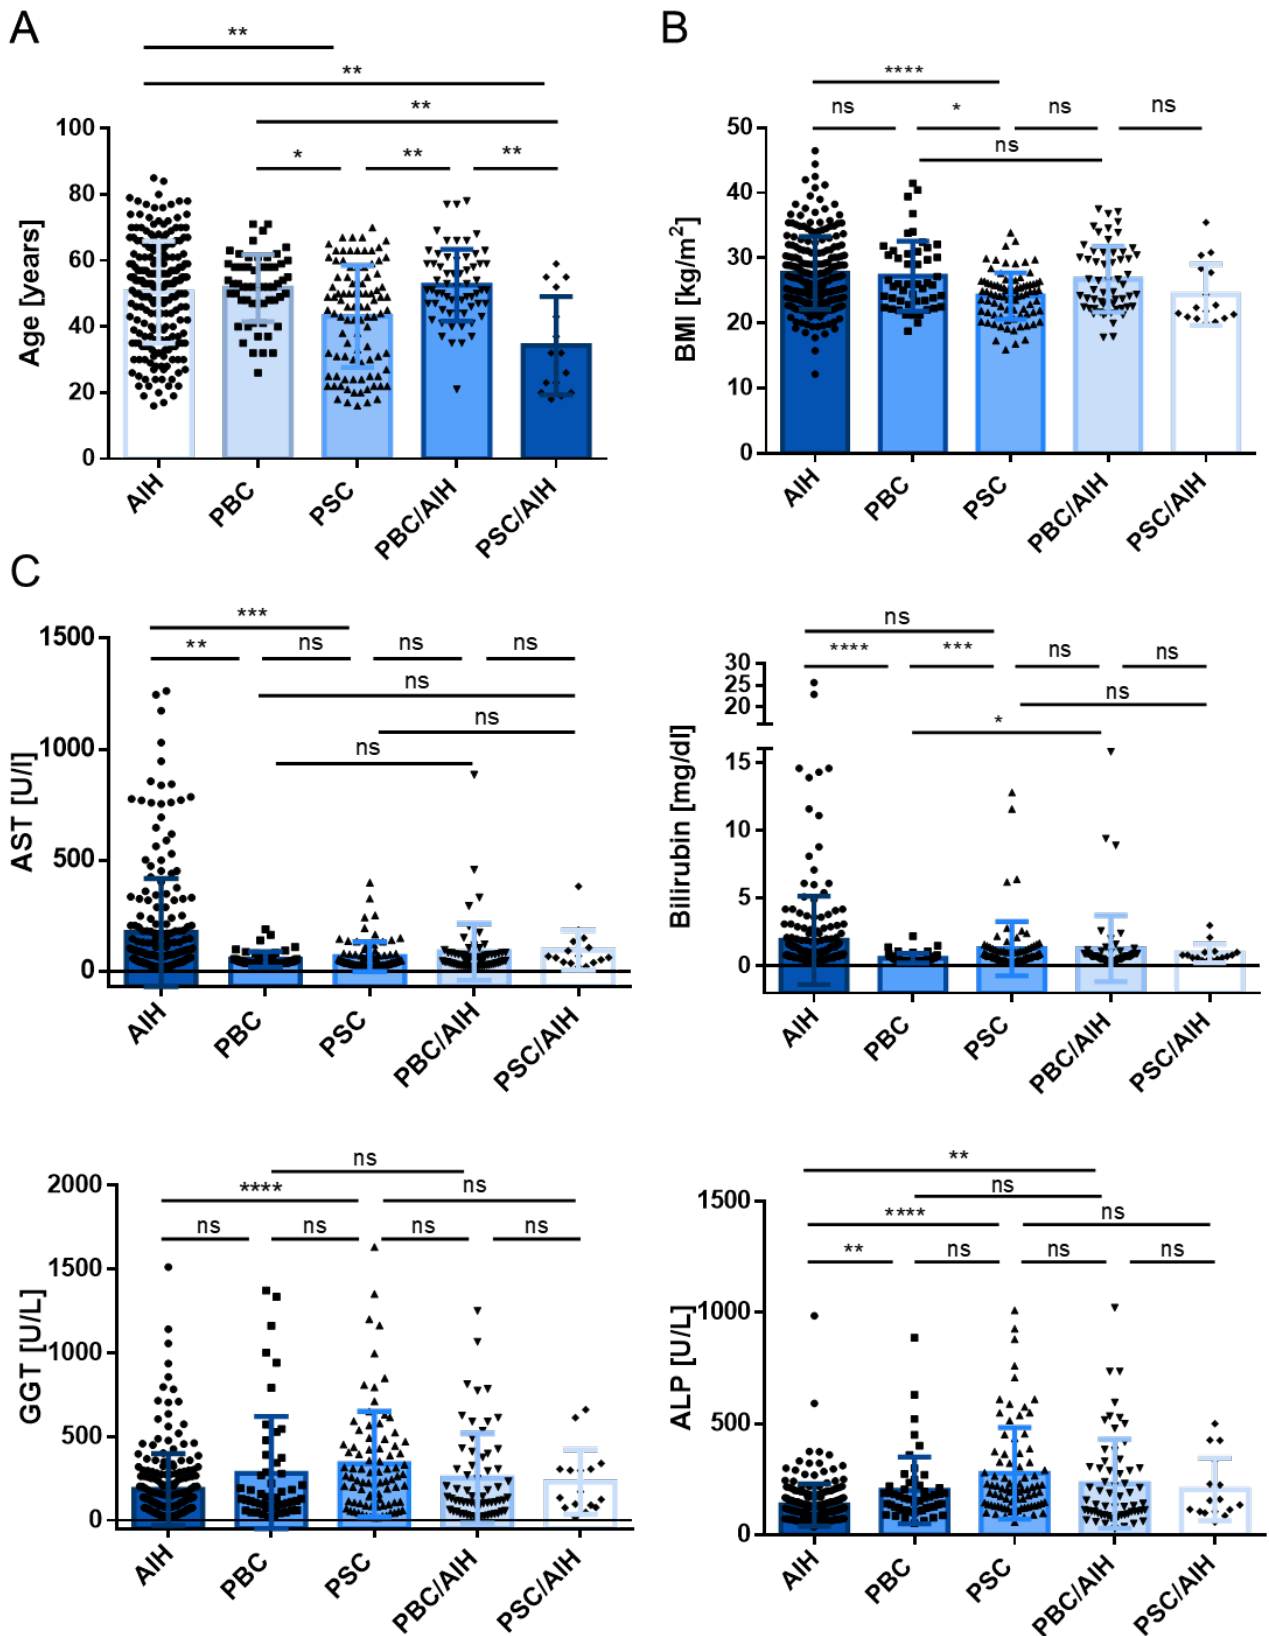

**Fig. S2: Clinical characteristics of liver-biopsied people with AILD.**

Demographical (A) clinical (B) and laboratory (C) characteristics of the study cohort.

Differences between subpopulations were compared by Kruskal-Wallis-test; ns=not significant; \*=p<0.05; \*\*=p<0.01; \*\*\* =p<0.001; \*\*\*\*=p<0.0001.

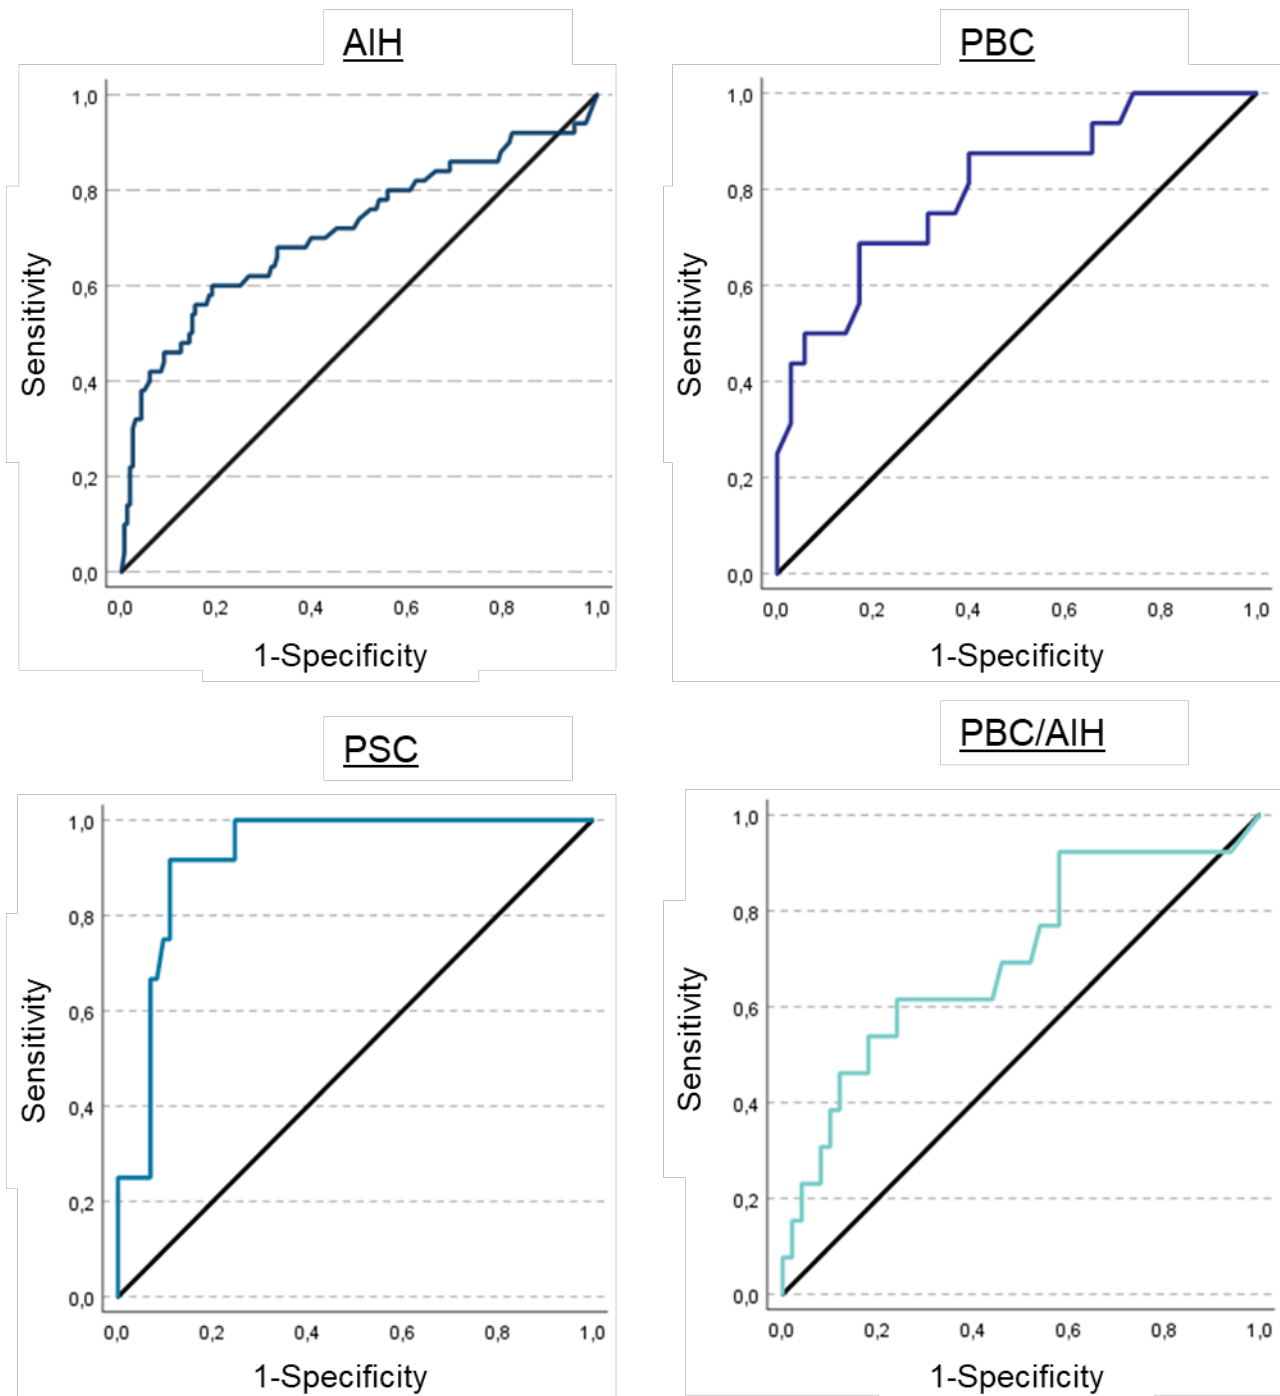

**Fig. S3: ROC curves of CAP measurement in people with ALD according to the underlying disease.**

AIH: AUROC=0.72; PBC: AUROC=0.81; PSC: AUROC= 0.93; AIH/PBC: AUROC=0.70.

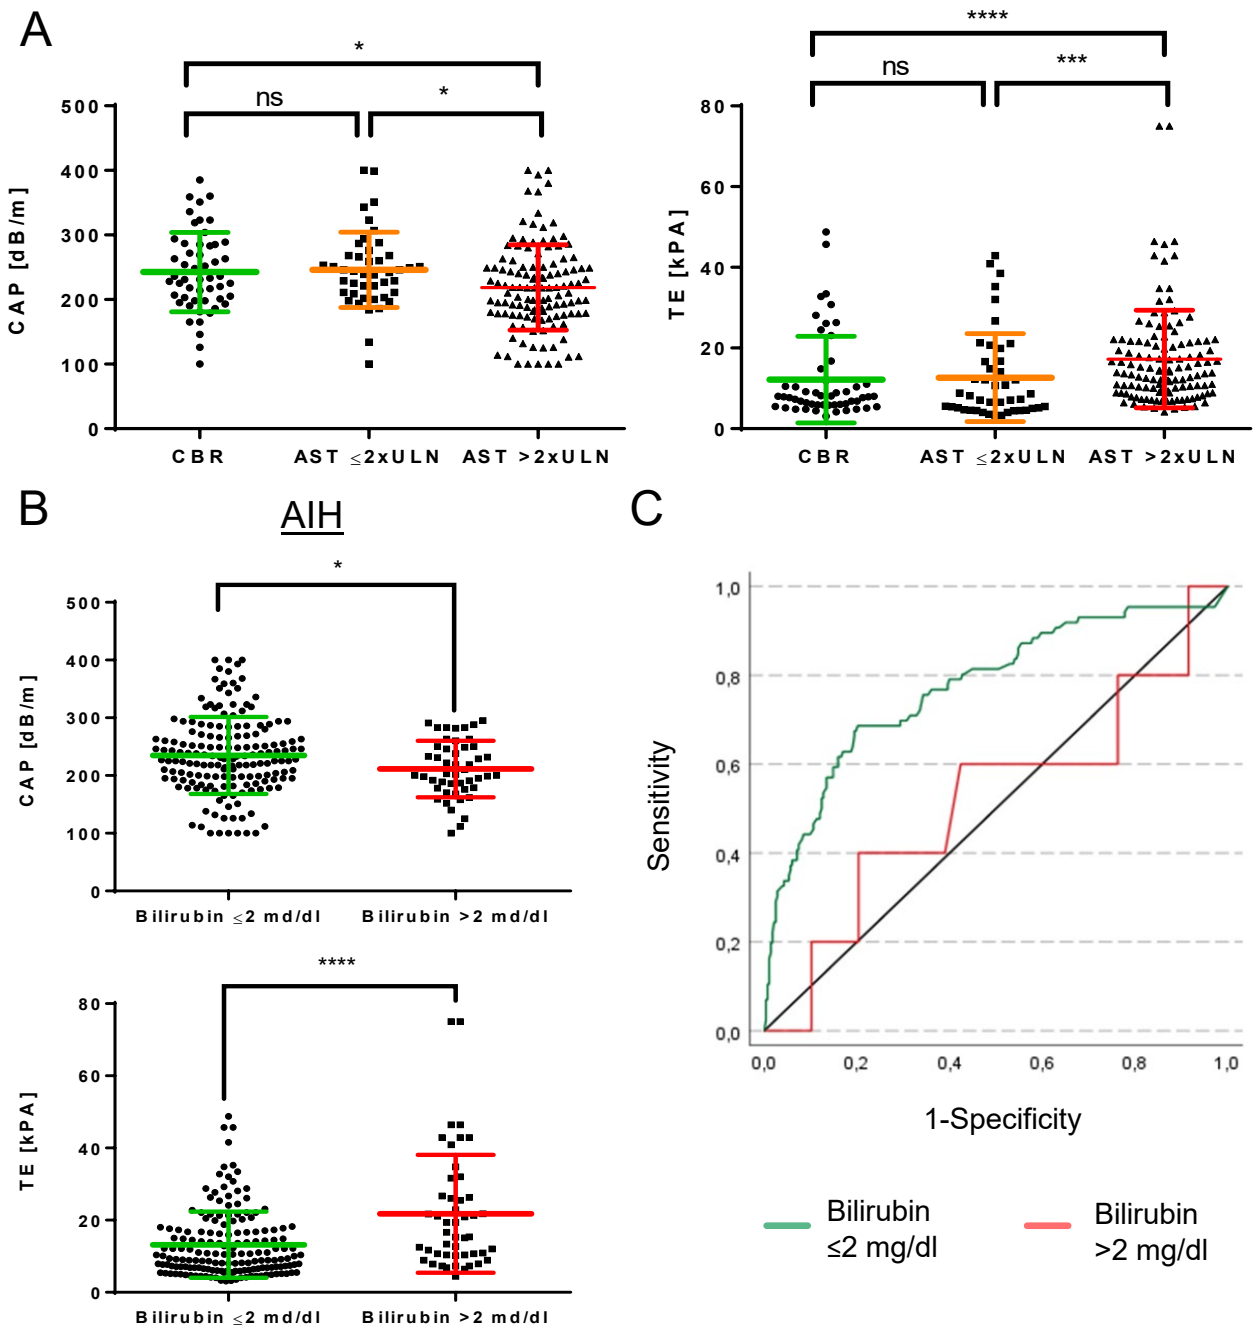

**Fig. S4: Effect of hepatic inflammation on elastography measurements in people with AIH.**

(A) Elastography measurements differ in people with AIH depending on AST levels (CBR: individuals with complete biochemical response,  $n=43$ ; AST  $< 2 \times \text{ULN}$ : people without CBR but AST levels  $< 2 \times \text{ULN}$ ,  $n=41$ ; AST  $> 2 \times \text{ULN}$ : individuals with AST levels  $> 2 \times \text{ULN}$  at time of elastography,  $n=134$ ). (B) Mean CAP and TE values of individuals with AIH. Patients without jaundice ( $n=169$ ) show significantly increased CAP ( $p=0.028$ ) and decreased TE values ( $p<0.0001$ ) compared to those with bilirubin levels above 2 mg/dl ( $n=49$ ). (C) In patients with bilirubin levels above 2 mg/dl (red curve) accuracy of CAP to determine hepatic steatosis was lower (AUROC: 0.522) than in individuals without jaundice (AUROC: 0.774; Hanley and McNeil test:  $p=0.092$ ). Differences between two groups were tested by Mann-Whitney-test. Differences within more than two subpopulations were compared by Kruskal-Wallis-test, ns= not significant, \*=  $p<0.05$ ; \*\*\* =  $p<0.001$  ; \*\*\*\*=  $p<0.0001$

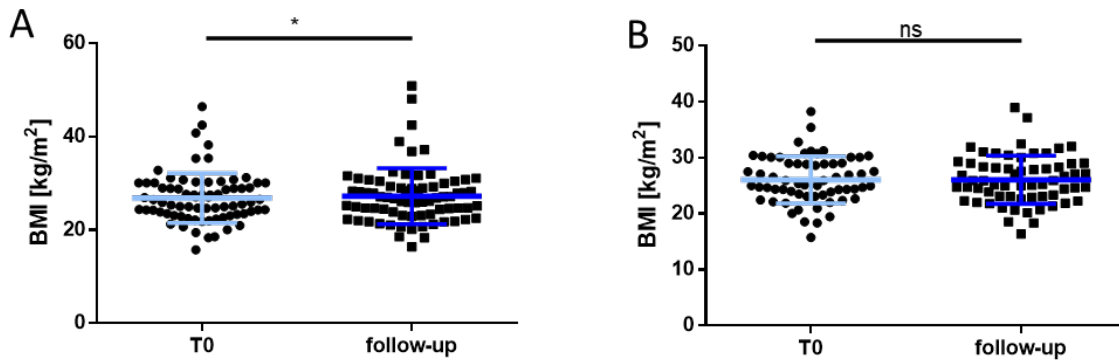

**Fig. S5: Changes of BMI in people with AIH upon follow-up.**

(A) BMI of all individuals with AIH with high inflammatory activity (T0) and upon elastography follow-up as complete biochemical response (CBR) was achieved, (n=74). (B) BMI of individuals with AIH with high inflammatory activity (T0) and upon follow-up without substantial weight gain (> 10% of initial body weight) (n=62), p=0.3. Wilcoxon matched-pairs signed-rank test was used to test differences of AIH patient upon follow-up. ns=not significant; \*=p<0.05.

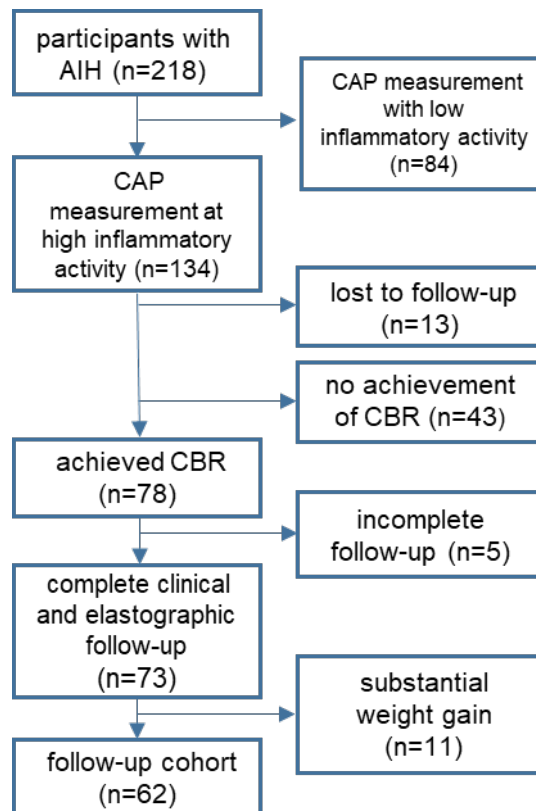

**Fig. S6: Flowchart of participant selection for evaluation of follow-up CAP measurement in AIH upon achievement of complete biochemical response (CBR).**

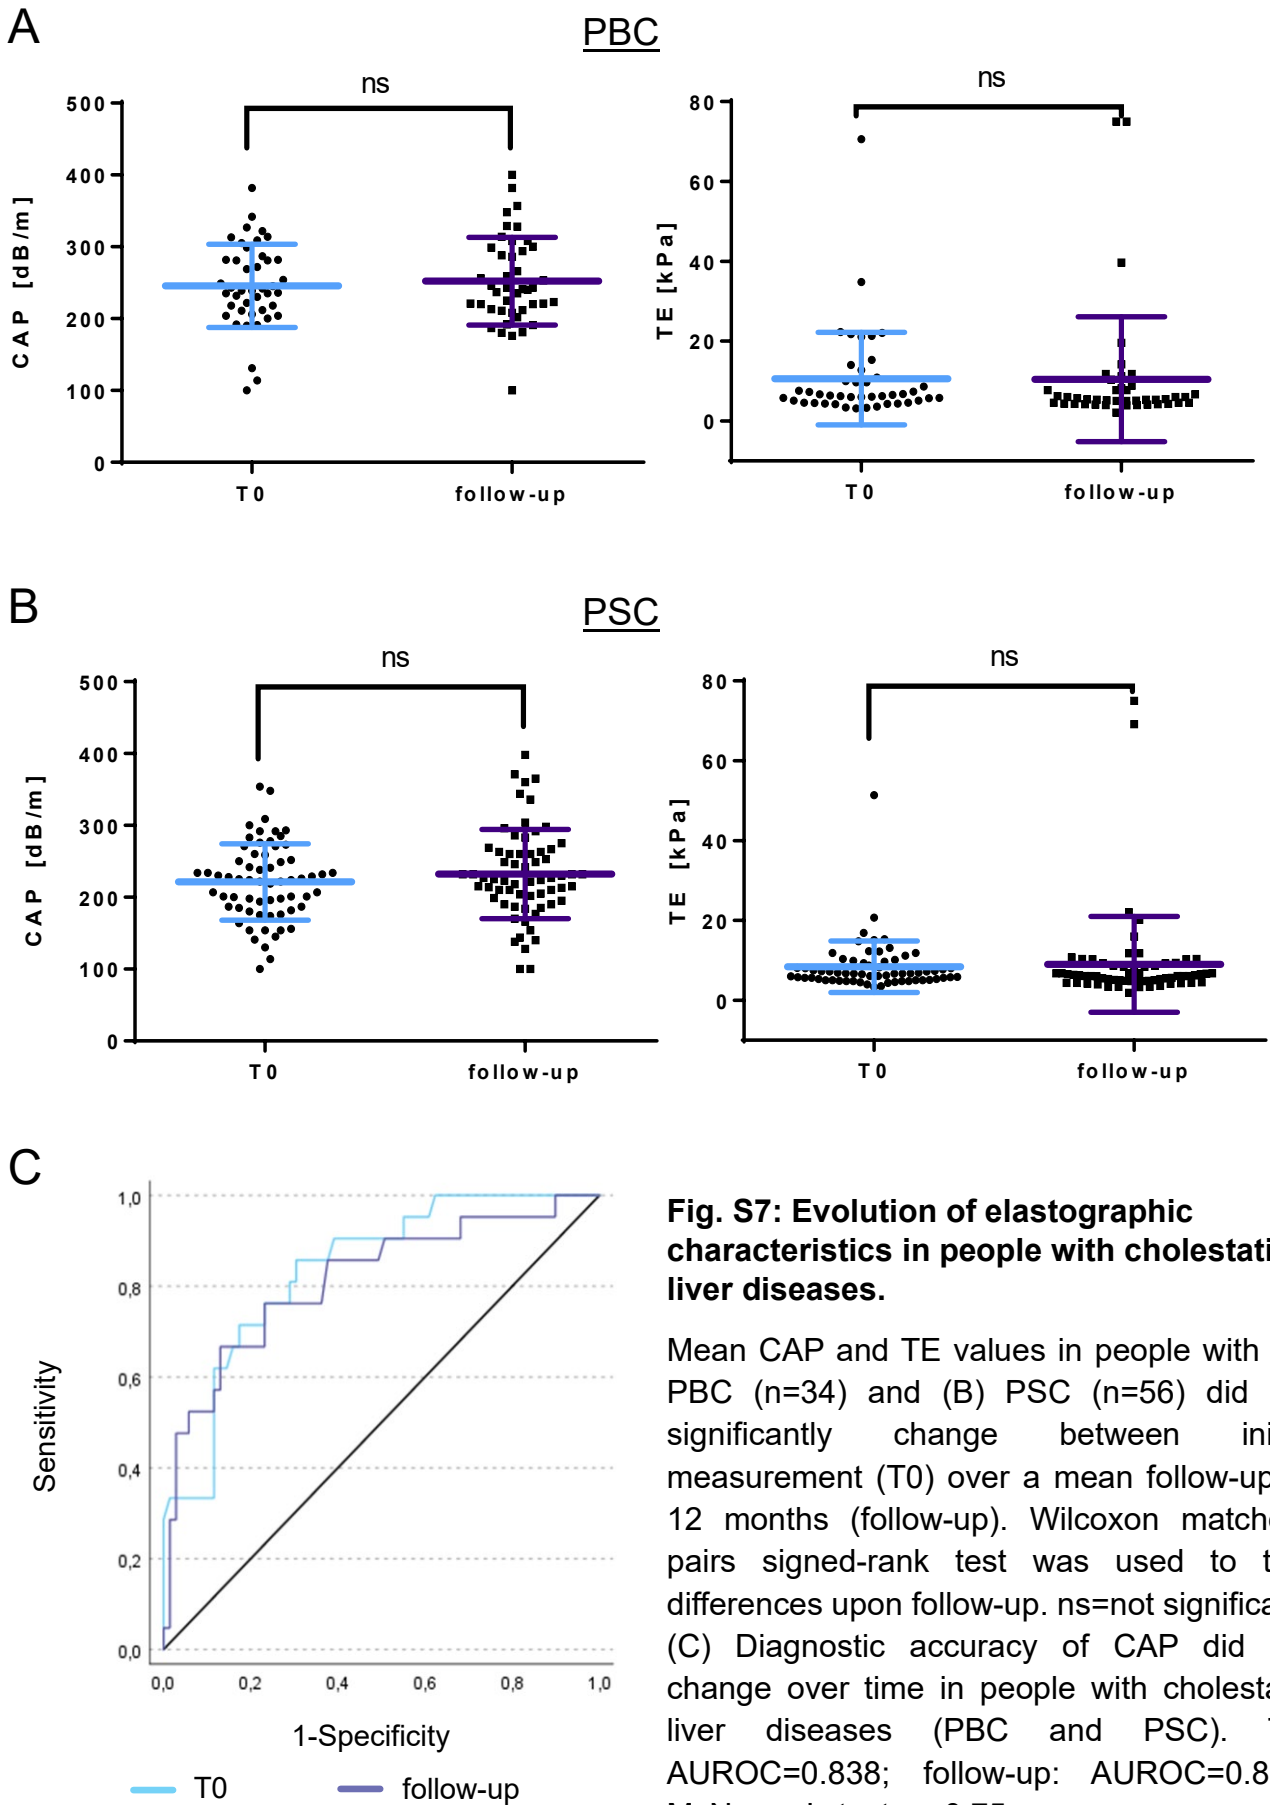

**Table S1: Elastographic characteristics of people with AILD who received a liver biopsy.**

| Value         | AIH              | PBC                 | PSC                 | AIH/PBC          | AIH/PSC             | p=               |
|---------------|------------------|---------------------|---------------------|------------------|---------------------|------------------|
| TE kPa        | 11.0<br>(3.1;75) | 6.7<br>(3.2;75)     | 6.9<br>(3.3;67)     | 9.2<br>(3.8;75)  | 9.1<br>(4.5;48)     | <b>&lt;0.001</b> |
| IQR TE        | 1.5<br>(0;33)    | 1.0<br>(0;8.4)      | 1.1<br>(0;11.7)     | 1.4<br>(0.4;23)  | 1.2 (0.1;4.9)       | <b>0.01</b>      |
| CAP<br>dB/m   | 229.6<br>(±64.2) | 245.5<br>(±62.7)    | 212.3<br>(±56.2)    | 230.6<br>(±63.0) | 205.2<br>(±62.8)    | <b>0.03</b>      |
| IQR CAP       | 39 (0;125)       | 37 (0;155)          | 40 (0;113)          | 38 (0;168)       | 53 (16;103)         | 0.87             |
| CAPmedian/IQR | 0.18<br>(0;0.7)  | 0.14<br>(0.02;0.52) | 0.22<br>(0.12;0.73) | 0.18<br>(0;0.53) | 0.22<br>(0.07;0.74) | 0.33             |

Data is presented as median (and minimum; maximum) or mean ( $\pm$  SD), as appropriate. Means of groups were compared using Kruskal-Wallis-test.



**Table S2: Clinical and elastographic characteristics of people with AIH, PBC and PSC at first time of CAP-measurement (T0) and upon elastographic follow-up assessment.**

| Value                              | AIH (n=153)      |                  |                   | PBC (n=34)       |                  |                   | PSC (n=56)       |                  |                   |
|------------------------------------|------------------|------------------|-------------------|------------------|------------------|-------------------|------------------|------------------|-------------------|
|                                    | T0               | follow-up        | p=                | T0               | follow-up        | p=                | T0               | follow-up        | p=                |
| Time between measurements (months) | 12 (1;24)        |                  |                   | 10 (3;22)        |                  |                   | 12 (1;22)        |                  |                   |
| BMI (kg/m <sup>2</sup> )           | 27.1 (15.8;46.5) | 27.5 (16.4;50.9) | 0.12              | 26.1 (18.8;46.5) | 27.4 (18.3;42.5) | 0.75              | 24.7 (17.3;33.9) | 24.1 (17.3;32.8) | 0.97              |
| hemoglobin (g/dl)                  | 13.6 (±1.5)      | 13.5 (±1.6)      | 0.24              | 13.4 (±1.1)      | 13.6 (±1.0)      | 0.38              | 13.9 (±1.4)      | 13.8 (±1.9)      | 0.99              |
| platelets (10 <sup>9</sup> /l)     | 220 (±86)        | 223 (±81)        | 0.30              | 263 (±82)        | 261 (±95)        | 0.83              | 267 (±76)        | 250 (±80)        | 0.22              |
| albumin (g/l)                      | 36.7 (±4.7)      | 39.4 (±4.2)      | <b>&lt; 0.001</b> | 38.1 (±3.8)      | 38.8 (±3.8)      | 0.20              | 38.5 (±4.4)      | 39.1 (±4.8)      | 0.32              |
| bilirubin (mg/dl)                  | 0.8 (0.2;14.6)   | 0.7 (0.2;4.4)    | <b>&lt; 0.001</b> | 0.5 (0.2;2.2)    | 0.5 (0.2;4.6)    | <b>0.06</b>       | 0.7 (0.2;6.4)    | 0.6 (0.2;7.3)    | 0.91              |
| cholesterol (mg/dl)                | 197 (±52)        | 200 (±43)        | 0.20              | 207.6 (±53.5)    | 203.6 (±38.7)    | 0.12              | 204 (±58)        | 202 (±56)        | 0.63              |
| triglycerides (mg/dl)              | 110 (44;552)     | 102 (33;749)     | 0.88              | 142 (50;617)     | 124 (56;728)     | 0.74              | 83 (41;694)      | 89 (47;536)      | 0.08              |
| AST (U/l)                          | 62 (14;1262)     | 30 (10;796)      | <b>&lt; 0.001</b> | 41 (19;188)      | 27 (14;145)      | <b>&lt; 0.01</b>  | 38 (15;399)      | 27 (11;176)      | <b>&lt; 0.001</b> |
| ALT (U/l)                          | 82 (15;2506)     | 30 (10;909)      | <b>&lt; 0.001</b> | 62 (24;375)      | 32 (11;171)      | <b>&lt; 0.001</b> | 64 (19;485)      | 32 (9;291)       | <b>&lt; 0.001</b> |
| GGT (U/l)                          | 100 (15;1513)    | 34 (9;649)       | <b>&lt; 0.001</b> | 110 (20;1334)    | 71 (11;1040)     | <b>&lt; 0.001</b> | 265 (15;1931)    | 65 (9;956)       | <b>&lt; 0.001</b> |
| AP (U/l)                           | 106 (35;986)     | 76 (23;419)      | <b>&lt; 0.001</b> | 140 (53;630)     | 102 (50;586)     | <b>&lt; 0.001</b> | 204 (58;708)     | 150 (53;712)     | <b>&lt; 0.001</b> |
| Gamma Globulin (%)                 | 19.3 (9.7;41.6)  | 16.8 (8.0;33.4)  | <b>&lt; 0.001</b> | 19.1 (±1.5)      | 18.3 (±4.7)      | <b>0.03</b>       | 18.9 (±5.2)      | 17.4 (±3.7)      | 0.14              |
| IgG (g/l)                          | 15.3 (6.2;56.9)  | 12.1 (5.0;31.6)  | <b>&lt; 0.001</b> | 14.6 (±4.2)      | 13.3 (±3.9)      | <b>0.01</b>       | 14.1 (±4.4)      | 13.7 (±3.5)      | 0.33              |
| IgA (g/l)                          | 2.3 (0.1;25.2)   | 2.0 (0.1;11.4)   | <b>&lt; 0.001</b> | 2.2 (±0.6)       | 2.1 (±0.7)       | 0.12              | 2.4 (±1.1)       | 2.4 (±1.2)       | 0.92              |
| IgM (g/l)                          | 1.2 (0.3;7.7)    | 1.1 (0.2;3.4)    | <b>&lt; 0.001</b> | 1.8 (±0.3)       | 1.5 (±0.4)       | <b>0.02</b>       | 1.3 (±0.9)       | 1.3 (±0.8)       | 0.82              |
| Quick (%)                          | 89 (±22)         | 93 (±24)         | <b>&lt; 0.001</b> | 105 (±11)        | 105 (±16)        | 0.64              | 103 (±18)        | 100 (±16)        | 0.16              |
| TE (KPa)                           | 10.7 (3.2;75)    | 7.3 (3.3;37.2)   | <b>&lt; 0.001</b> | 6.5 (3.2;70.6)   | 5.8 (3.9;75)     | <b>0.04</b>       | 6.8 (3.3;51.4)   | 6.1 (3.3;75)     | 0.21              |
| CAP (dB/m)                         | 227 (100;400)    | 233 (100;398)    | <b>0.04</b>       | 237 (114;382)    | 242 (172;400)    | 0.45              | 225 (114;354)    | 224 (100;398)    | 0.40              |

Continuous variables are presented as median (and minimum; maximum) or mean (±SD), as appropriate. Wilcoxon matched-pairs signed-rank test was used to test differences between T0 and follow-up.

**Table S3: Correlation analysis of evolution of CAP and changes of clinical markers.**

| Value                   | All AILD |        | AIH    |         | PBC    |       | PSC    |       |
|-------------------------|----------|--------|--------|---------|--------|-------|--------|-------|
|                         | $\rho$   | p      | $\rho$ | p       | $\rho$ | p     | $\rho$ | p     |
| $\Delta$ BMI            | 0.179    | 0.007  | ns     |         | 0.369  | 0.034 | 0.367  | 0.006 |
| $\Delta$ Bilirubin      | -0.226   | 0.001  | -0.244 | 0.003   | ns     |       | -0.389 | 0.003 |
| $\Delta$ AST            | -0.187   | 0.004  | -0.241 | 0.003   | ns     |       | ns     |       |
| $\Delta$ ALT            | -0.213   | 0.001  | -0.265 | 0.001   | ns     |       | ns     |       |
| $\Delta$ GGT            | -0.231   | <0.001 | -0.354 | <0.0001 | ns     |       | ns     |       |
| $\Delta$ Gamma globulin | -0.179   | 0.038  | -0.235 | 0.028   | ns     |       | ns     |       |

Changes of CAP in follow-up elastography assessment in people with AIH (n=153), PBC (n=43) and PSC (n=64) was expressed as delta ( $\Delta$ ) of CAP. Differences of clinical parameters between initial and follow-up CAP measurement were expressed as their delta value. Correlation between  $\Delta$  CAP was estimated using the Spearman's  $\rho$  coefficient.

**Table S4: Demographic and clinical characteristics of people with AIH at first time of CAP-measurement (T0) and upon CAP-measurement after CBR was achieved (follow-up).**

| Value                                     | T0 (n=62)        | follow-up (n=62) | p=                |
|-------------------------------------------|------------------|------------------|-------------------|
| <b>Time between measurements (months)</b> | 12.5 (1;26)      |                  |                   |
| <b>cirrhosis presence of</b>              | 19.4 % (12)      | 19.4 % (12)      | 1.0               |
| <b>TE (kPa)</b>                           | 10.5 (3.2;42.9)  | 6.2 (2.8;27.0)   | <b>&lt;0.0001</b> |
| <b>CAP (dB/m)</b>                         | 199.5 (100;321)  | 236.5 (113;373)  | <b>&lt;0.0001</b> |
| <b>BMI (kg/m<sup>2</sup>)</b>             | 25.3 (15.8;38.3) | 26.1 (±4.3)      | 0.93              |
| <b>hemoglobin (g/dl)</b>                  | 13.8 (±1.2)      | 13.6 (±1.6)      | 0.92              |
| <b>platelets (10<sup>9</sup>/l)</b>       | 214 (±68)        | 225 (±81)        | 0.42              |
| <b>albumin (g/l)</b>                      | 36.9 (±4.9)      | 41.0 (±3.8)      | <b>&lt;0.0001</b> |
| <b>bilirubin (mg/dl)</b>                  | 1.1 (0.4;21)     | 0.6 (0.3;2.5)    | <b>&lt;0.001</b>  |
| <b>HbA1c (%)</b>                          | 5.3 (±0.6)       | 5.5 (±0.4)       | 0.1               |
| <b>cholesterol (mg/dl)</b>                | 193.4 (±48.6)    | 208.0 (±42.9)    | <b>&lt;0.05</b>   |
| <b>triglycerides (mg/dl)</b>              | 127.1 (±78.5)    | 119.4 (±62.3)    | 0.75              |
| <b>AST (U/l)</b>                          | 144 (40;1262)    | 24 (13;46)       | <b>&lt;0.0001</b> |
| <b>ALT (U/l)</b>                          | 277 (60; 2506)   | 24 (10;48)       | <b>&lt;0.0001</b> |
| <b>GGT (U/l)</b>                          | 190 (30;1213)    | 24 (9; 204)      | <b>&lt;0.0001</b> |
| <b>AP (U/l)</b>                           | 126 (40;1513)    | 73 (32;275)      | <b>&lt;0.0001</b> |
| <b>IgG (g/l)</b>                          | 15.9 (6.2;30)    | 10.6 (8.6;23.5)  | <b>&lt;0.0001</b> |

Cirrhosis was determined based on histopathological findings. Nominal variables are presented as frequencies (and total numbers). Continuous variables are presented as median (and minimum; maximum) or mean (±SD), as appropriate. Wilcoxon matched-pairs signed-rank test was used to test differences between T0 and follow-up.
